# Supplementary material
Source: publisher figshare collection journal article supplement (https://karger.figshare.com/ndownloader/files/20269701)
Supplement: Supplementary file 1 [file 20269701]

**Supplemental Table 1**  Clinical data from patients

| Patient (Prior diag ) | Age at surgery  (y)/sex | Sz onset age  (y) | Etiology | | Preopera-tive disability | MRI | | Seizure  types | Lateralized seizure types | EEG |
| --- | --- | --- | --- | --- | --- | --- | --- | --- | --- | --- |
| Cause Occurred  Time (y/m/d) | | Findings Regions | |
| 1 | 3/M | 0.6 | ICH | 2m | HP,HO(L) | H atrophy(R) | H. | Tonic, FS, Spasm  AA,GTCS | Spasm，FS | USSW(L), PFA; Ic：L (70%) or R(30%) |
| 2(West Syn) | 3.9/F | 1.5 | Enceph-alitis | 6m | D(R) | H atrophy(L) | H. | Tonic, FS,  Spasm | FS | (1) US SW (RO)+ BFT, RFT Max; (2) Modified HA like Pattern in Sleep; Ic:BO, BF, Multi-area. |
| 3 | 4/F | 1 | ICH | 40d | D(L) | F-T-P, EM(R)  porencephaly | 3 lobes | Tonic, Spasm | Spasm | USSW(L), PFA.;  Ic: R. |
| 4(West Syn) | 8/F | 3 | Cryp. | / | -- | T-O( B )  atrophy  L dominant | Bilateral,  1 lobe dominated | Tonic,FS,  spasm, MC，AA | FS | 1. (1) BSSW R Max. 2. (2) Asym.HA or modify HA like, R Max Ic: B. |
| 5 | 5/M | 3.5 | ICH-Tra-uma | 2m | HP, HO(R) | H.EM(L) | H. | Tonic,FS,  spasm, AA | FS | USSW( R), PFA; Ic:RF. |
| 6 | 5/M | 4 | TS | / | -- | TS. F-P huge tubers(R) | Bilateral,  2 lobes dominated | FS , AT  Spasm, | FS | BSSW, L Max.;  Ic:R(70%) or LF FA(30%) |
| 7 | 6/M | 1 | ICH | 2m | D(L) | F-T-P EM(R) | 3 lobes | Tonic,  Spasm | spasm | (1) BSSW, PFA. R Max; (2) Focal SEW(R); Ic：FA (RF) |
| 8 | 7/F | 3 | ICH | 21d | D(R) | H atrophy(L) | H. | Spasm.  MC | spasm | (1) U SSW +S-W (R); (2) U F-PO S-W(R); Ic:B. R Max |
| 9 | 8/F | 3 | ICH-Trauma | 50d | HP(R) | H atrophy(L) | H. | Tonic,PS，GTCS | - | (1) USSW,R Max;(2) F-C or P-O-T Focal SEW(L ) ; Ic:R. |
| 10 | 8/M | 1 | ICH | 4m | D(L) | H atrophy(R) | H. | Spasm | - | U SSW(L); Ic:LPO. |
| 11 | 8/M | 1 | HIE | 1d | HO(L) | BO,atrophy,  RO EM(R) | Bilateral,  1 lobe dominated | Tonic, Spasm，MC | Spasm | (1) BSSW, LO Max; (2) PO-PT S-W(L); Ic:B; |
| 12 | 9/M | 1 | Cryp. | / | HP(R) | H atrophy(L) | H. | Tonic, Spasm | - | (1) USSW, R Max.PFA;  (2) S-W, R Max. Ic:R; |
| 13 | 10/M | 6 | ICH | 1m | HP(R) | H EM(L) | H. | FS | FS | (1) USSW,R Max ;  (2) focal SEW(L F-PO)  (3) S-W, R Max; Ic：L |
| 14(West Syn) | 11/F | 0.8 | TS. | Congen-ital | D(R) | TS. LP EM | Bilateral,  1 lobe dominated | Tonic, AA, GTCS, Spasm | - | (1) BSSW PFA, RF Max.  (2) Asym-. Hypsar, modified HA like Pattern in Sleep.R Max; Ic：R |
| 15 | 11/M | 7 | Cryp. | / | D(R) | HP atrophy/ T-P EM(L) | H. | Tonic,  FS,AT | FS | USSW, R Max, PFA; Ic.：RF. |
| 16(West Syn) | 5/M | 0.2 | Cryp. | / | D.HO(R) | BO EM, LO dominant(L) | Bilateral,  1 lobe dominated | Tonic, Spasm，PS | FS | (1) BSSW, PFA. R Max; Ic:B; (2) focal SEW (L); |
| 17 | 14/F | 4 | Encephalitis | 4y | D(R) | F-T-P EM. (L) | 3lobes | Tonic, GTCS, FS | FS | B SSW. PFA. R Max; Ic:B, R Max; |
| 18 | 15/M | 8 | ICH-  Trauma | 35d | HP, HO(R) | H atrophy/ EM(L) | H. | Tonic,FS, GTCS | FS | (1)USSW, R Max  (2) Focal SEW (LO); Ic: RFT (80%) with suspicious  FA on LPO(20%); |
| 19 | 16/M | 8 | HIE | 1d | -- | T cyst (L);  P EM. (R) | Bilateral,  1 lobe dominated | Tonic, FS,  Spasm, AA | - | B SSW,PFA,L Max. Ic：L Max; L (70%) or R(30%).earlier starting. |
| 20 | 16/M | 4 | HIE | 1d | HP, HO(R) | H atrophy (L) | H. | Tonic, FS，GTCS | FS | (1) U SSW**,**.PFA,R Max;  (2) Focal SEW (LF); Ic:B |
| 21 | 17/F | 12 | Enceph-alitis | 6m | HP, HO(R) | H atrophy(L) | H. | Tonic, FS,  spasm, MC | FS | (1) U SSWPFA. R Max;  (2) Focal SEW(LFT); Ic：B (R 70%,L 30%); |
| 22(West Syn) | 19/F | 1 | Encephalitis | 3m | D.HO(R) | H atrophy/PO EM. (L) | H. | Tonic, FS, Spasm | FS | (1) B SSW, PFA. R Max;  (2) modified HA like pattern in Sleep;  (3) Focal SEW( L), Ic: B( R 70%,L 30%); |
| 23 | 20/F | 5 | ICH-  Trauma | 5y | HP(L) | H atrophy(L) | H. | FS, Spasm,  GTCS | FS, Spasm | (1) U SSW, PFA, L Max;  (2) S-W, L Max. Ic：L 50% or B 50%; |
| 24 | 22/M | 9 | HIE | 1d | HP(L) | RHP EM | H. | FS, GTCS | FS | (1) BSSW. L Max;  (2) Focal SEW(RF); Ic：B (R 70%,L 30%); |

***(Continued)***

| Patient (Prior diag) | Surgical Procedures | Histopathology | Pre-IO | Follow-  up (y) | Engel class | Post-  IQ | Post-  Movement | Post-  Language | Re-EEG (Post-O) | Non- discharges  EEG time(y) |
| --- | --- | --- | --- | --- | --- | --- | --- | --- | --- | --- |
| 1 | HSY（R） | Gliosis with necrosis and liquefaction | / | 1 | I | 52 | Up | Up | None | 1 |
| 2(West Syn) | MLR（L） | Gliosis with necrosis and liquefaction | / | 12 | II | 55 | Up | Same  (Normal) | Improved | / |
| 3 | HSY（R） | Gliosis with hemorrhage and liquefaction | 45 | 4 | I | 64 | Up | Same  (Normal) | None | 1 |
| 4(West Syn) | MLR+MST  +CC（L） | Gliosis with hemorrhage and liquefaction | / | 5 | IV | / | Down | Same  (poor) | Unimproved | / |
| 5 | HSY（L） | Gliosis with necrosis and liquefaction | 47 | 6 | / | 53 | Down | Same  (Normal) | None | 0.5 |
| 6 | FR+CC（R） | FCDIIb | 49 | 4 | II | 55 | No change  (Normal) | Same  (Normal) | Improved | / |
| 7 | HSY（R） | Gliosis with emosiderosis, with hemorrhage and liquefaction | 43 | 1 | I | 53 | Up | Up | Improved | / |
| 8 | HSY（L） | Gliosis with hemorrhage and VM | 52 | 9 | I without meds | 69 | Up | Up | None | 1 |
| 9 | FR +MST（L） | Gliosis with necrosis and liquefaction | 55 | 7 | I without meds | 63 | Up | Up | None | 3 |
| 10 | MLR+MST（R） | Gliosis with necrosis and liquefaction | / | 6 | I | 55 | No change | Same  (Normal) | Improved | / |
| 11 | FR +MST+CC（R） | Gliosis with hemorrhage and VM | / | 13 | I | 52 | No change  (Normal) | Same  (Normal) | None | 2 |
| 12 | MLR +MST（L） | Gliosis with necrosis and liquefaction | 45 | 10 | I without meds | 56 | No change | Same  (Normal) | None | 2 |
| 13 | HSY（L） | Gliosis with necrosis and liquefaction | 52 | 6 | I without meds | 75 | No change | Up | Improved | / |
| 14(West Syn) | MLR+MST（L） | FCD IIb+Gliosis with hemorrhage and VM | / | 9 | II | / | Up | Up | Improved | / |
| 15 | HSY（L） | Gliosis with necrosis and liquefaction | 53 | 8 | I | 67 | No change | Same  (Normal) | None | 0.25 |
| 16(West Syn) | MLR +MST+CC（L） | Gliosis with necrosis edema and liquefaction | / | **8** | I without meds. | 56 | Up | Up | None | 2 |
| 17 | HSY（L） | Gliosis with necrosis edema and liquefaction | <30 | 4 | III | <30 | Down | Same  (normal) | Unimproved | / |
| 18 | HSY（L） | Gliosis with necrosis and liquefaction | 58 | 10 | I without meds | 70 | No change | Up | None | 1 |
| 19 | MLR +CC（R） | FCD IIId+hemorrhage with edima | 57 | 1 | III | 62 | No change  (Normal) | Same  (Normal) | Unimproved | / |
| 20 | MLR（L） | FCD IIId +gliosis | 58 | 4 | I | 67 | No change | Up | None | 2 |
| 21 | MLR（L） | Gliosis with necrosis and liquefaction | 55 | 6 | I | 66 | Down | Down | None | 1 |
| 22(West Syn) | MLR+MST（L） | Gliosis with hemorrhage and VM | 50 | 9 | I | 64 | No change | Up | None | 2 |
| 23 | HSY（R） | Gliosis with hemorrhage and VM | 57 | 6 | I | 78 | Up | Up | None | 2 |
| 24 | MLR+MST（R） | Gliosis with hemorrhage and VM | 54 | 8 | I | 65 | Down | Up | Improved | / |

AA，Atypical Absence; AT, Atonic; B, Bilateral; C, Central; Cryp, cryptogenic; D, Disability; EM, Encephalomalacia; F, Female or Frontal; FS, Focal Seizure; GTCS ,Generalized Tonic Clonic Seizure; HA, Hypsarrhythmia ; HO, Hemianopsia; HP, Hemiparesis; HS, Hemisphere; HIE, Hypoxic- ischemic encephalopathy; HSY, Hemispherectomy/ Hemispherotomy; Ic, Ictal; L, Left; M, Male; MC, Myoclonic Seizure; MLR, Multilobar Resection; O, Occiptal; P, Parietal; R, Right; Sz, Seizure; SSW, Slow Spike-Waves; Syn, Syndrome; S-W, Spike-Waves; U, Unilateral; VM, Vascular Malformation.
